# Supplementary material for: Reduced ER–mitochondria connectivity promotes neuroblastoma multidrug resistance
Source: PubMed Central journal article supplement — EMBO J. 2022 Feb 25;41(8):e108272. doi: 10.15252/embj.2021108272 (PMC9016347; doi:10.15252/embj.2021108272), 2022-02-25
Supplement: EMBJ-41-e108272-s003.pdf [file EMBJ-41-e108272-s003.pdf]

**Coku, et al., Reduced ER-mitochondria connectivity promotes neuroblastoma multidrug resistance**

**Appendix Table of Contents**

- Appendix Figure S1: Most REL neuroblastomas are resistant to chemotherapeutics and molecularly targeted drugs.
- Appendix Figure S2: Attenuating transfer of calcium from ER to mitochondria does not attenuate mitochondrial stress responses.

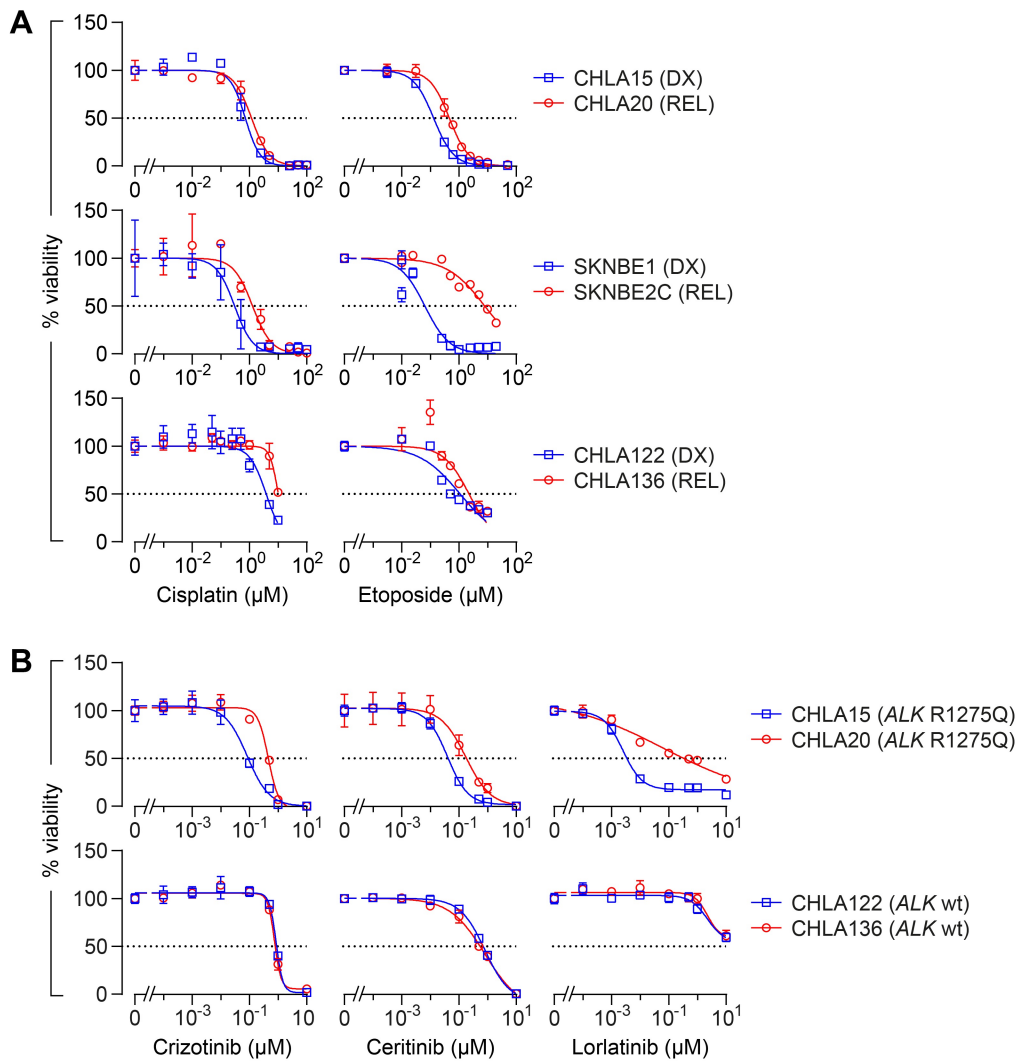

**Appendix Figure S1. Most REL neuroblastomas are resistant to chemotherapeutics and molecularly targeted drugs.**

**(A)** In vitro viability for multiple DX/REL tumor pairs exposed to cisplatin or etoposide for 72 hours. **(B)** Viability is shown for DX/REL pairs with an activating ALK mutation (CHLA15/CHLA20) and without (CHLA122/CHLA136) following 120 hour exposure to the ALK inhibitors crizotinib, ceritinib or lorlatinib. Data points are mean and SD from triplicate wells, experiments are representative of at least three biological replicates.

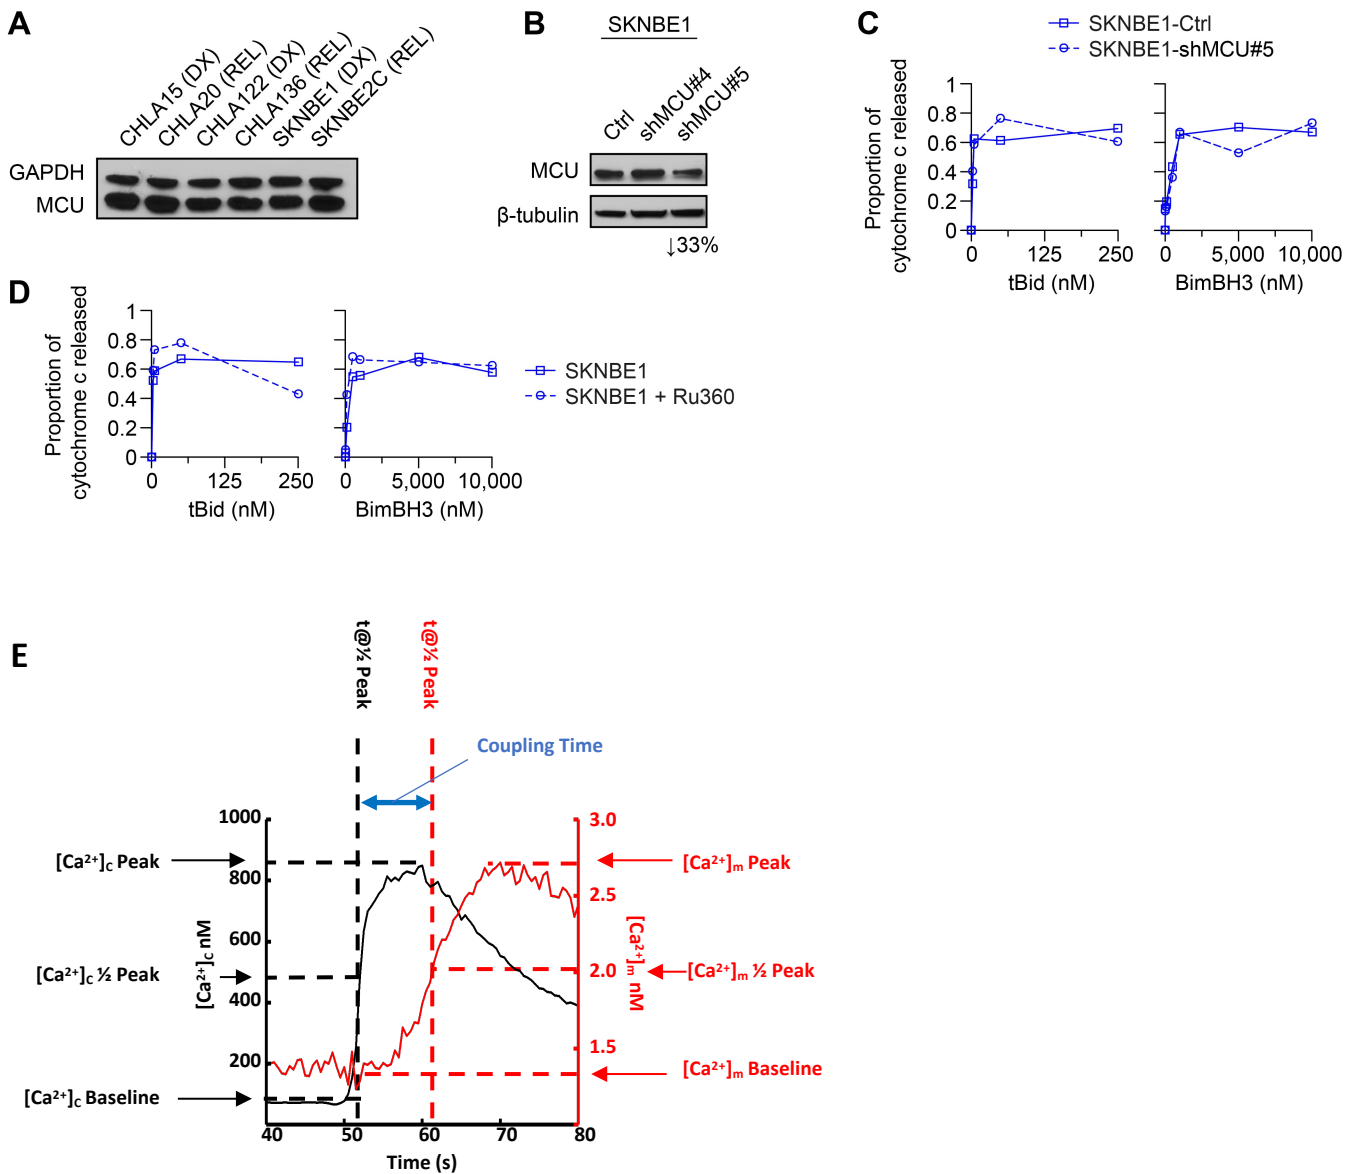

**Appendix Figure S2. Attenuating transfer of calcium from ER to mitochondria does not attenuate mitochondrial stress responses.** (A) Immunoblot detection of MCU (mitochondrial calcium uniporter) expression across patient-matched pairs of at-diagnosis (DX) and post-relapse (REL) neuroblastomas. (B) Silencing of the mitochondrial calcium uniporter (MCU) in SKNBE1 cells, with ~33% reduction in MCU at the protein level in SKNBE1-shMCU#5. (C) Mitochondrial cytochrome c release for SKNBE1-shMCU#5 cells following exposure to tBid or BimBH3 peptide. (D) Mitochondrial cytochrome c release for SKNBE1 cells following exposure to tBid or BimBH3 peptide, with or without 30-minute Ruthenium-360 pre-treatment (Ru360). (E) Schematic representation of the coupling time metric derived from concurrent measurement of cytosolic  $Ca^{2+}$  and mitochondrial  $Ca^{2+}$ . For C and D, data points are mean of duplicate wells (SD<0.05 at all points) in a representative experiment from at least three biological replicates.
